# Supplementary material
Source: PubMed Central journal article supplement (PMC7959987)
Supplement: 16-00791.pdf [file 16-00791.pdf]

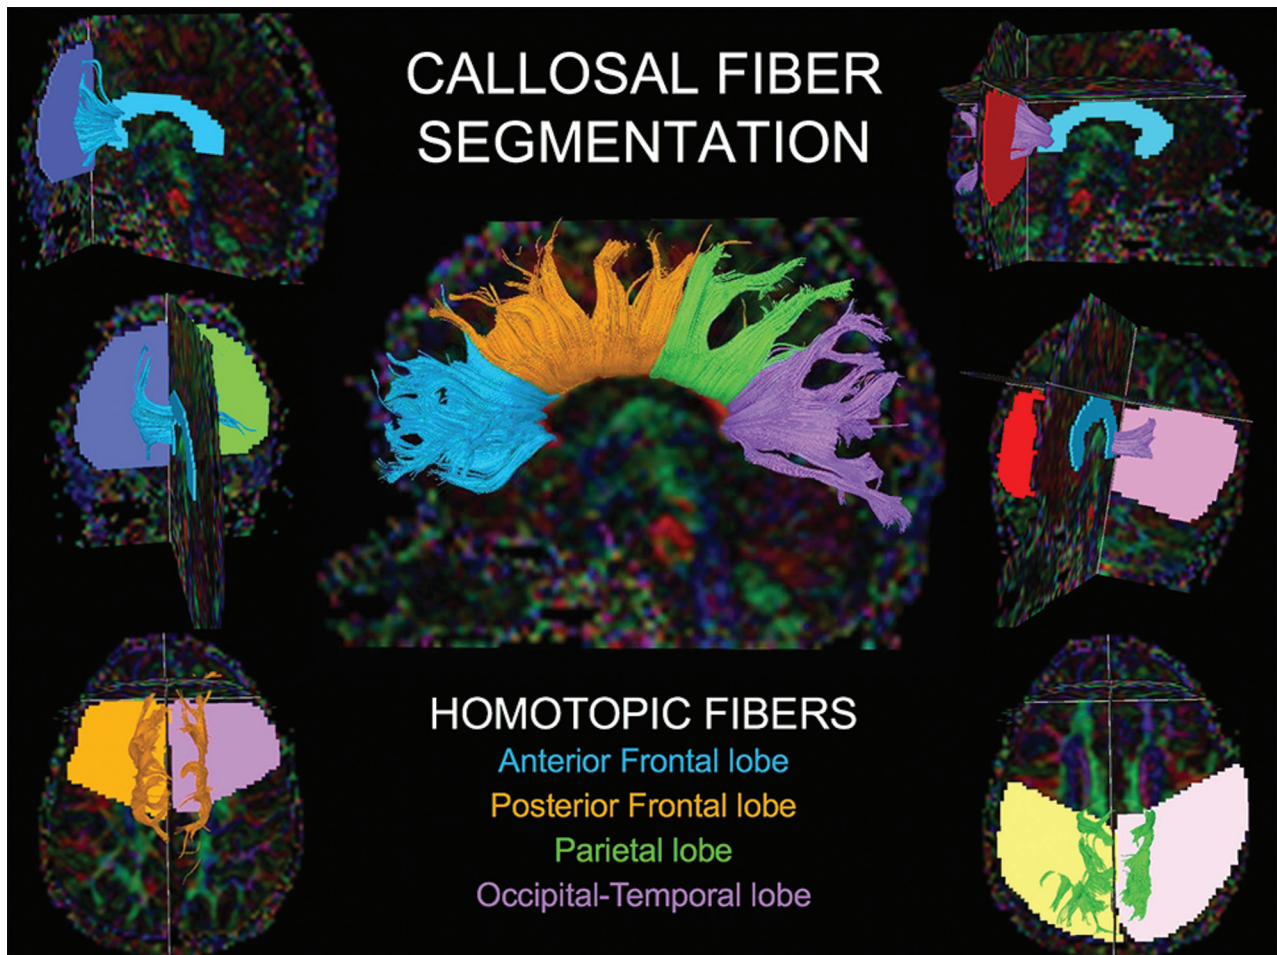

**ON-LINE FIG 1.** Callosal tract segmentation procedure, shown for a control subject. A region of interest is first drawn on the midline sagittal section of fractional anisotropy colored maps to include all callosal fibers. These fibers are further segmented and colored according to their projections to specific lobar areas (ie, homotopic anterior and posterior frontal, parietal, and occipitotemporal tracts [*central image*]). For the anterior frontal lobe projections, 2 additional ROIs are placed on a coronal section in each hemisphere anterior to the rostrum (*left upper and middle images*). For the posterior frontal lobe and parietal lobe projections, an axial section is chosen at the most posterior edge of the parieto-occipital sulcus. Two ROIs for posterior frontal projections are then placed to encompass the region between the coronal section used for anterior frontal fibers and the central sulcus (*left lower image*). Two ROIs for parietal lobe connections are placed on the same axial section, in the region posterior to the central sulcus (*right lower image*). Projections to the occipital and temporal lobes are segmented by using 2 ROIs placed on coronal images posterior to the callosum, encompassing regions inferior to the parieto-occipital sulcus (*right upper and middle images*). Additionally, we reconstructed cingulum, fornices, and Probst bundles: ROIs were placed on coronal images within the Probst bundle and cingulum bilaterally and on axial and coronal images within the fimbria to trace hippocampal axons (not shown).

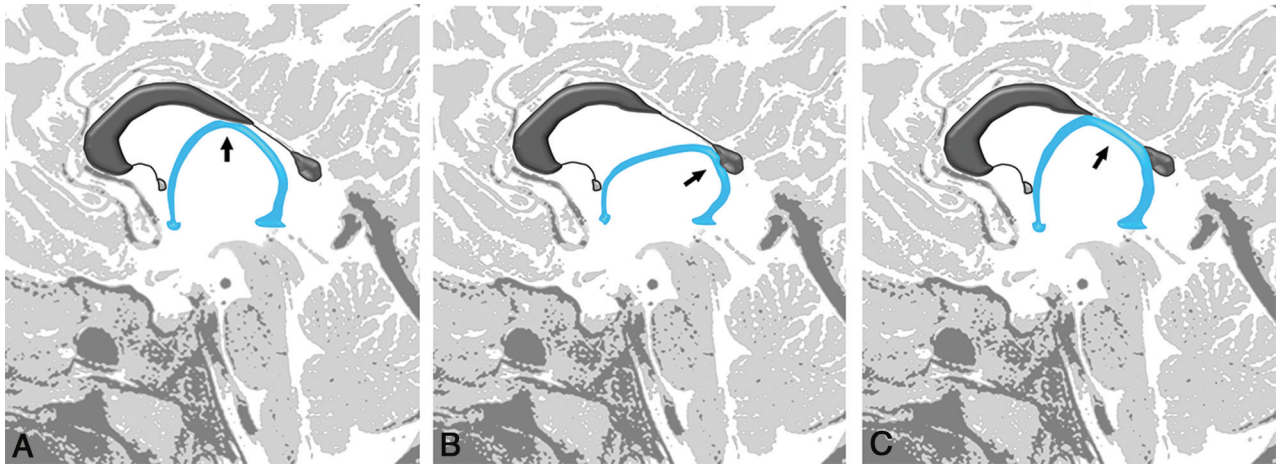

**ON-LINE FIG 2.** Anatomic schemes of the 3 types of segmental callosal agenesis. *A*, In segACC type I, the fornices and the hippocampal commissure lie beneath the anterior callosal segment (*arrow*). *B*, In segACC type II, the fornices and the hippocampal commissure lie beneath the posterior callosal segment (*arrow*). *C*, In segACC type III, the intermediate segment of the commissural plate is made of the joining fornices and hippocampal commissure (*arrow*).

## Control

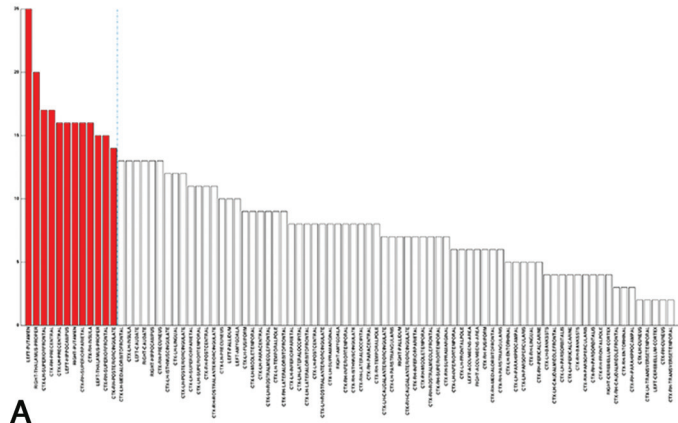

A

## PVC

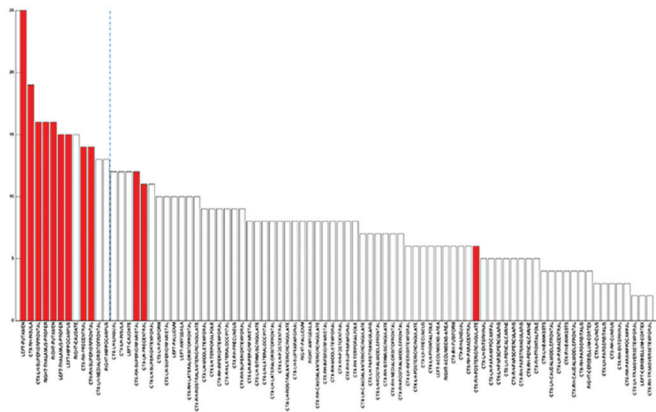

C

## SegACC

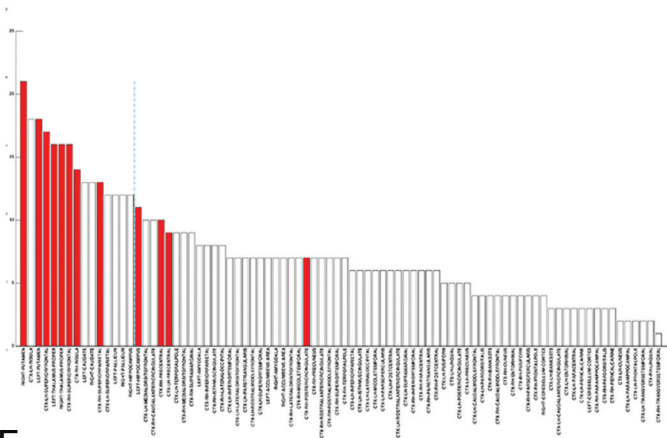

E

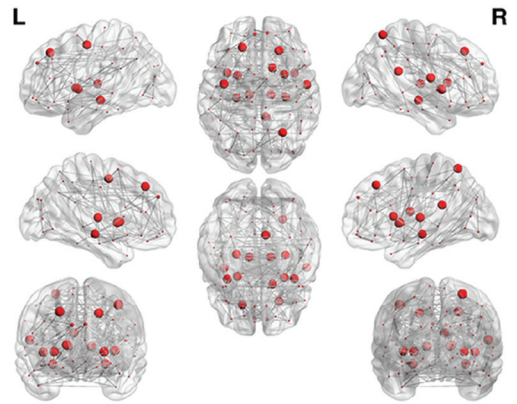

B

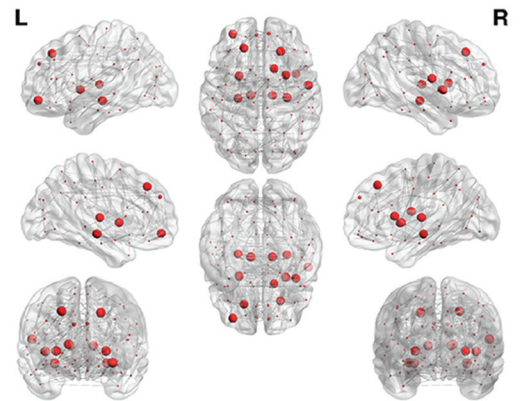

D

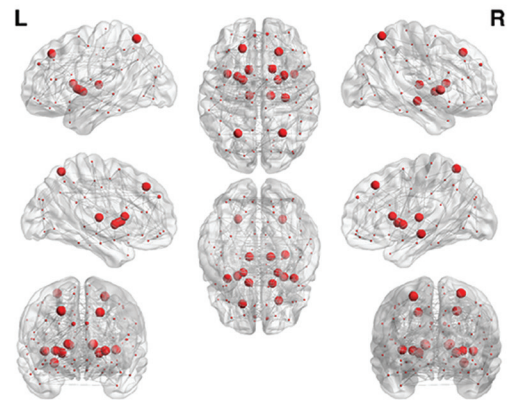

F

**ON-LINE FIG 3.** Hubs for the consensus connectomes in the control (A and B), partial virtual callosotomy (C and D), and segmental callosal agenesis (E and F) groups. The bar graphs reveal the degree of distribution across nodes for the consensus connectomes (A, C, and E): The *red bars* demonstrate the nodes with degrees greater than mean plus 1 SD for the control consensus connectome in A. The *dashed lines* demonstrate the cutoff for mean plus 1 SD for the PVC controls and patients with segACC. The *red bars* in C and E show the redistribution of hub regions in the PVC and segACC consensus connectomes, compared with control consensus connectomes: Any red node appearing to the right of the *dashed line* has been demoted from hub status and any *white bar* to the left of the *dashed line* is a node that has been promoted to a hub. The 3D schematic graphs depict the spatial distribution of hubs (represented by *larger red circles*) within the corresponding consensus connectomes (B, D, and F). L indicates left; R, right.



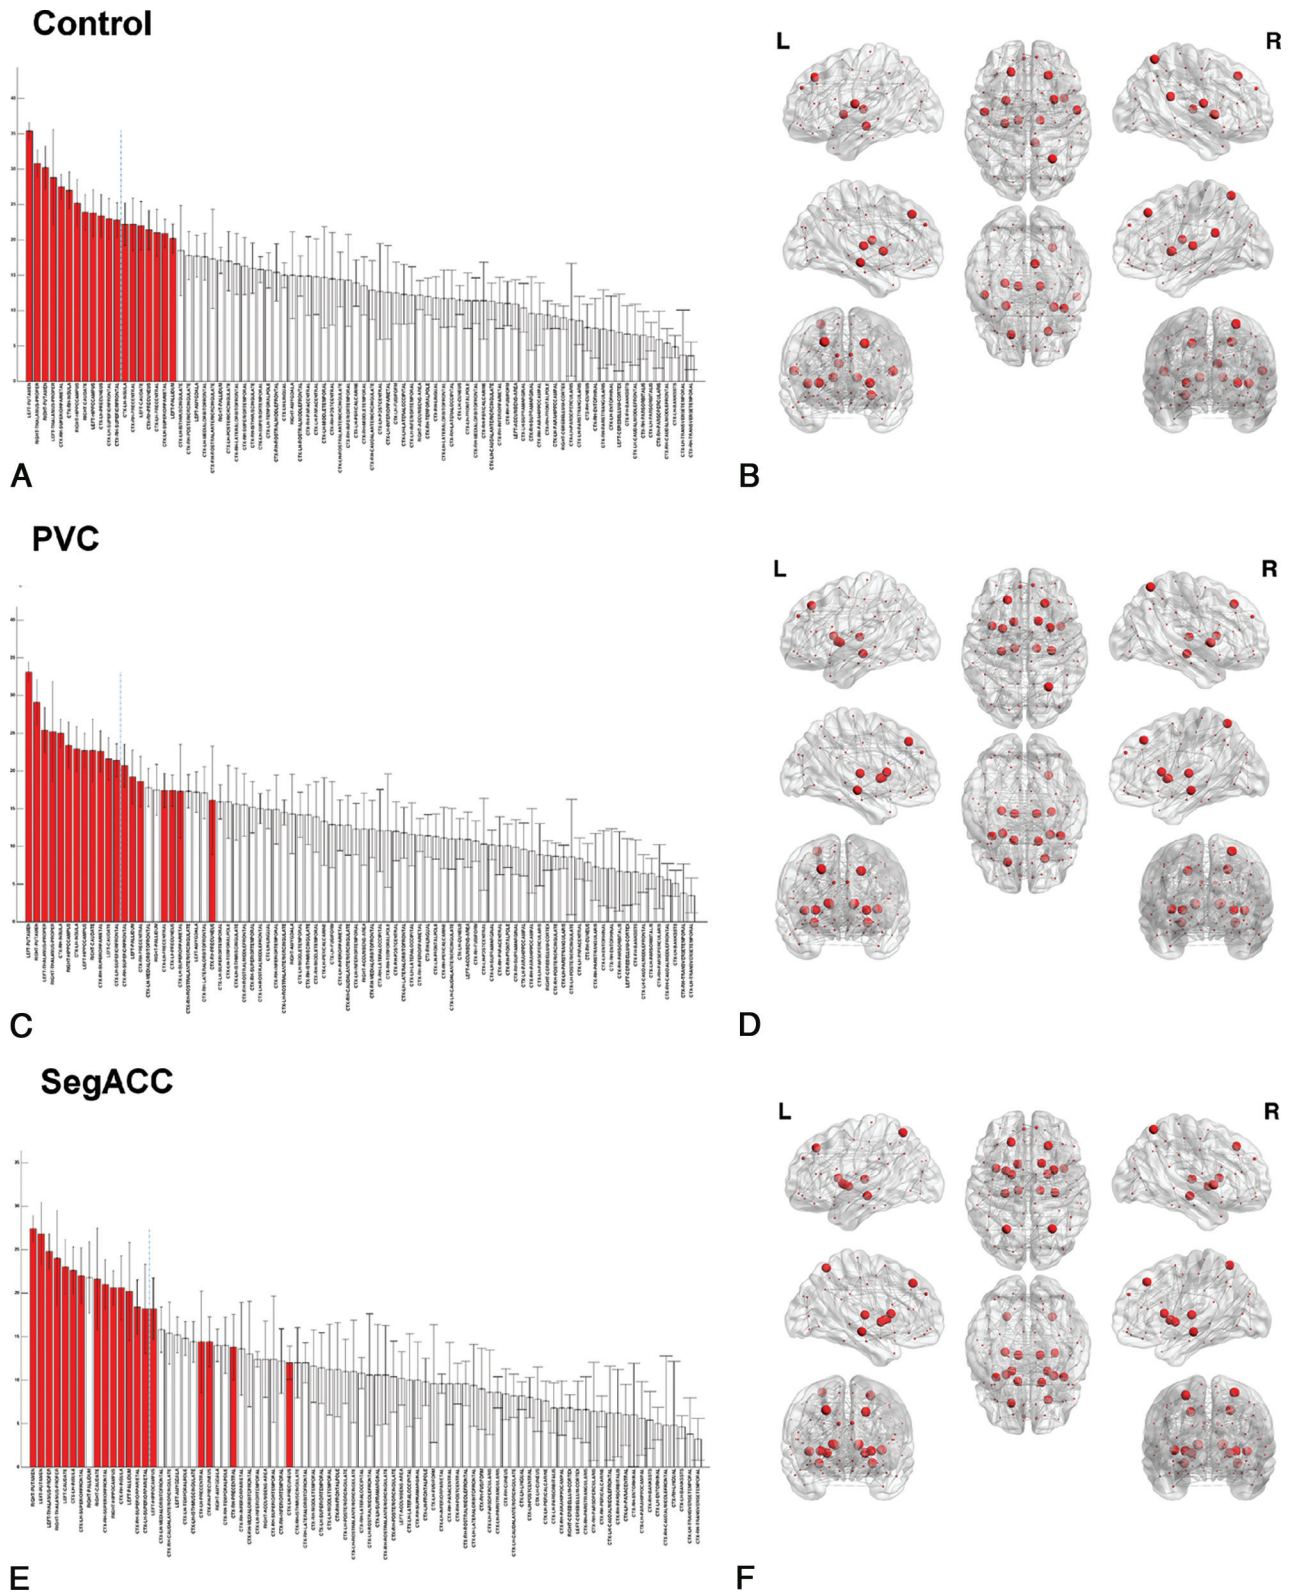

**ON-LINE FIG 4.** Hubs for individual connectomes in the control (A and B), partial virtual callosotomy (C and D), and segmental callosal agenesis (E and F) groups. The bar graphs reveal the mean degree of distribution across nodes for the individual connectomes with SD error bars (A, C, and E); The red bars demonstrate the nodes with a degree greater than mean plus 1 SD for the controls (A). The dashed lines demonstrate the cutoff for mean plus 1 SD for the PVC and for segACC. The red bars in C and E show the redistribution of regions in the individual connectomes of the PVC and segACC groups, respectively, compared with the hubs in the individual connectomes of control subjects: Any red node appearing to the right of the dashed line has been demoted from hub status, and any white bar to the left of the dashed line is a node that has been promoted to hub. The 3D schematic graphs depict the spatial distribution of hubs (represented by larger red circles) within the corresponding individual connectomes (B, D, and F). L indicates left; R, right.

**On-line Table 1: Clinical, genetic, and neuroradiologic findings of patients with segACC**

|                                                  | SegACC Type I                                                                                                                                                                                       |                                                                                                                             |                                                                                                                                                                                                                                                              | SegACC Type II                                                                       |                                                                                                                   |                                                                                                                                                      | SegACC Type III                                                                                  |                                                                                                                                           |  |
|--------------------------------------------------|-----------------------------------------------------------------------------------------------------------------------------------------------------------------------------------------------------|-----------------------------------------------------------------------------------------------------------------------------|--------------------------------------------------------------------------------------------------------------------------------------------------------------------------------------------------------------------------------------------------------------|--------------------------------------------------------------------------------------|-------------------------------------------------------------------------------------------------------------------|------------------------------------------------------------------------------------------------------------------------------------------------------|--------------------------------------------------------------------------------------------------|-------------------------------------------------------------------------------------------------------------------------------------------|--|
|                                                  | Patient 1                                                                                                                                                                                           | Patient 2                                                                                                                   | Patient 3                                                                                                                                                                                                                                                    | Patient 4                                                                            | Patient 5                                                                                                         | Patient 6                                                                                                                                            | Patient 7                                                                                        | Patient 8                                                                                                                                 |  |
| Sex                                              | Male                                                                                                                                                                                                | Male                                                                                                                        | Female                                                                                                                                                                                                                                                       | Female                                                                               | Male                                                                                                              | Male                                                                                                                                                 | Male                                                                                             | Female                                                                                                                                    |  |
| Ethnic origin                                    | Caucasian                                                                                                                                                                                           | Caucasian                                                                                                                   | Caucasian                                                                                                                                                                                                                                                    | Caucasian                                                                            | Caucasian                                                                                                         | Caucasian                                                                                                                                            | Hispanic                                                                                         | Caucasian                                                                                                                                 |  |
| Age at MRI                                       | 5 yr 11 mo                                                                                                                                                                                          | 1 yr                                                                                                                        | 2 yr                                                                                                                                                                                                                                                         | 5 yr 10 mo                                                                           | 5 yr 4 mo                                                                                                         | 5 yr 7 mo                                                                                                                                            | 1 mo                                                                                             | 1 yr 2 mo                                                                                                                                 |  |
| OFI at MRI (cm) (centiles)                       | 56.3 (>97*)                                                                                                                                                                                         | 47 (75-90*)                                                                                                                 | 42.3 (<3*)                                                                                                                                                                                                                                                   | 49 (5-10*)                                                                           | 54 (90-97*)                                                                                                       | 49 (<3*)                                                                                                                                             | 31 (<3*)                                                                                         | 46 (75*)                                                                                                                                  |  |
| Commissural anomaly/other brain malformations    | Ectopic callosal bundle/isolated                                                                                                                                                                    | Ectopic callosal bundle, ACH/isolated                                                                                       | ACH/partial empty sella                                                                                                                                                                                                                                      | Pseudo-diencephalic cyst, pontine hypoplasia                                         | Ectopic callosal bundles/IP-II, cervicomedullary neuroschisis, vertebral malformations                            | ACH/PNH, pontine hypoplasia, ectopic posterior pituitary gland, optic nerve hypoplasia                                                               | ACH/isolated                                                                                     | Lateralobar arachnoid cyst                                                                                                                |  |
| Delivery                                         | Elective CS for previous CS                                                                                                                                                                         | Vaginal delivery with stained amniotic fluid                                                                                | Eutocic                                                                                                                                                                                                                                                      | NA                                                                                   | Vaginal delivery with stained amniotic fluid                                                                      | Urgent CS for cardiocirculatory alterations                                                                                                          | Urgent CS due to preeclampsia                                                                    | Elective CS for previous CS                                                                                                               |  |
| Age at delivery (wk)                             | 38                                                                                                                                                                                                  | 42                                                                                                                          | 40                                                                                                                                                                                                                                                           | 39                                                                                   | 40                                                                                                                | 38                                                                                                                                                   | 36 + 2 days                                                                                      | 37 + 4 days                                                                                                                               |  |
| Neonatal history                                 | Normal                                                                                                                                                                                              | Normal                                                                                                                      | Difficulties in sucking                                                                                                                                                                                                                                      | NA                                                                                   | Normal                                                                                                            | Intubation for respiratory distress                                                                                                                  | Intubation for respiratory distress, IUGR                                                        | Ventilation mask                                                                                                                          |  |
| Developmental delay                              | Mild                                                                                                                                                                                                | Severe                                                                                                                      | Moderate                                                                                                                                                                                                                                                     | Moderate                                                                             | Severe                                                                                                            | Severe                                                                                                                                               | Mild                                                                                             | Moderate                                                                                                                                  |  |
| Neurologic findings                              | Right eye esotropia, clumsiness, nasal voice                                                                                                                                                        | Alternating esotropia, hypomimia, hypotonia                                                                                 | Bilateral esotropia, nystagmus, dysphagia, hypotonia, hypotrophy, EEG epileptic anomalies (no clinical seizure)                                                                                                                                              | Hypomimia, clumsiness, seizures                                                      | Limitation in neck and upper limb movements, mirror movements, upper limb altered somatosensory-evoked potentials | Dysphagia, hypotonia, horizontal nystagmus                                                                                                           | Poor spontaneous movements, hypotrophy                                                           | Bilateral exotropia, hypotonia, clumsiness, seizures                                                                                      |  |
| Sphincter control                                | Delayed                                                                                                                                                                                             | Not acquired                                                                                                                | Not acquired                                                                                                                                                                                                                                                 | Delayed                                                                              | Normal                                                                                                            | Not acquired                                                                                                                                         | NA                                                                                               | Partially acquired                                                                                                                        |  |
| Language and communication                       | Poor expressive language with echolalia                                                                                                                                                             | Poor expressive language (2-3 significant words)                                                                            | Absent                                                                                                                                                                                                                                                       | Poor expressive language (about 10 words)                                            | Absent speech                                                                                                     | Absent expressive language                                                                                                                           | NA                                                                                               | Poor expressive language                                                                                                                  |  |
| Behavior/psychiatric disorder                    | Autism spectrum disorder, hyperactivity                                                                                                                                                             | Absent                                                                                                                      | Self-aggressive, low frustration tolerance                                                                                                                                                                                                                   | Hyperactivity                                                                        | Poor social interaction                                                                                           | Hyperactivity, low frustration tolerance                                                                                                             | Absent                                                                                           | Absent                                                                                                                                    |  |
| VEP/BAEP                                         | -/-                                                                                                                                                                                                 | -/-                                                                                                                         | -/-                                                                                                                                                                                                                                                          | -/-                                                                                  | -/-                                                                                                               | + (bilaterally)/-                                                                                                                                    | -/+ (right)                                                                                      | -/-                                                                                                                                       |  |
| Dysmorphic features                              | Macrocrania with turricephal, broad forehead, blepharophimosis, downturned lids, atverted nares, wide philtrum, thin lips, crowded teeth, stubby hands, bilateral simian crease and sandal gap sign | Prominent forehead, enophthalmos, mild blepharophimosis, prominent upper lip, retrognathia with horizontal line on the chin | Decreased growth, thick hair with low posterior and anterior hairline, hairy skin, synophrys with thick eyebrows, long eyelashes, small nose, wide philtrum, small mouth with crowded teeth, small posteriorly rotated ears, convex nails, toes clinodactyly | Prominent forehead, hypertelorism, arched eyebrows, rounded ears, thick everted lips | Low posterior hairline, large low set ears, short neck, facial asymmetry, thoracolumbar scoliosis                 | Wide nose with thick columella, simplified wide ear with absent helix, 1 café-au-lait spot                                                           | Mild proptosis, downturned eyelids, downturned thin lips                                         | Short stature, straight eyebrows, deep-set eyes, broad and flat nasal bridge, long philtrum, pointed chin, postnally rotated low-set ears |  |
| Extraneurologic malformations and other findings | Bilateral microphthalmia                                                                                                                                                                            | VSD, cryptorchidism, sacral dermal sinus, hypothyroidism                                                                    | Pectus excavatum, GH deficiency                                                                                                                                                                                                                              | Cardiac malformation                                                                 | Left hand first finger hypoplasia, bilateral kidney hypoplasia                                                    | Congenital unilateral cataract, tapetoretinal degeneration, bilateral cryptorchidism and small penis, GH, ACTH and TSH deficit, hypercholesterolemia | Inferior irideal coloboma, large PFO and VSD, bilateral inguinal hernia, penoscrotal hypospadias | Bilateral retinal-choroidal and optic nerve colobomas, VSD, pilonidal sinus                                                               |  |
| Metabolic testing                                | Normal                                                                                                                                                                                              | Normal                                                                                                                      | Normal                                                                                                                                                                                                                                                       | Normal                                                                               | Normal                                                                                                            | Normal                                                                                                                                               | Normal                                                                                           | Normal                                                                                                                                    |  |
| Karyotype and array-CGH                          | 46, XY normal                                                                                                                                                                                       | 46, XY normal                                                                                                               | 46, XX normal                                                                                                                                                                                                                                                | 46, XX, de novo dup(8p)                                                              | 46, XY normal                                                                                                     | 46, XY normal                                                                                                                                        | Paternal dup(2p25.3); maternal del(5q35.3) and del(16q23.1)                                      | 46, XX, de novo del(1p36.5-tel)                                                                                                           |  |
| Suspected diagnosis                              | Unknown                                                                                                                                                                                             | Unknown                                                                                                                     | Comelia de Lange-like syndrome                                                                                                                                                                                                                               | 8p duplication syndrome                                                              | Klippel-Feil syndrome                                                                                             | SOD spectrum                                                                                                                                         | Mowat-Wilson syndrome                                                                            | 1p36 deletion syndrome                                                                                                                    |  |

**Note:**—ACH indicates anterior commissure hypoplasia; ACTH, adrenocorticotropic hormone; BAEP, brain stem auditory-evoked potentials; CGH, comparative genomic hybridization; CS, cesarean delivery; del, deletion; dup, duplication; EEG, electroencephalography; GH, growth hormone; IP-II, incomplete partition type II; IUGR, intrauterine growth retardation; NA, not available; OFC, occipital frontal circumference; PFO, patent foramen ovale; PNH, periventricular nodular heterotopia; SOD, septo-optic dysplasia; TSH, thyroid-stimulating hormone; VEP, visual-evoked potentials; VSD, ventricular septal defect; -, normal; +, abnormal.

**On-line Table 2. Network consistency (correlation coefficient of connection strengths)**

|                                                               | Control (Mean) | PVC (Mean)    | SegACC (Mean)              |
|---------------------------------------------------------------|----------------|---------------|----------------------------|
| Consistency of individual networks with the consensus network | 0.844 ± 0.02   | 0.845 ± 0.059 | 0.852 ± 0.02               |
| Consistency between individual networks                       | 0.704 ± 0.083  | 0.707 ± 0.082 | 0.647 ± 0.038 <sup>a</sup> |

<sup>a</sup> Significantly different from control and PVC groups ( $P < .05$ ).

**On-line Table 3. Modules identified in healthy controls, with assignment of nodes to each module**

| Module 1                        | Module 2                 | Module 3                     | Module 4                         | Module 5                  |
|---------------------------------|--------------------------|------------------------------|----------------------------------|---------------------------|
| Left caudal anterior cingulate  | Left bankssts            | Left paracentral             | Left caudal middle frontal       | Right bankssts            |
| Left cuneus                     | Left entorhinal          | Right caudal middle frontal  | Left frontal pole                | Right cuneus              |
| Left isthmus cingulate          | Left fusiform            | Right insula                 | Left insula                      | Right entorhinal          |
| Left posterior cingulate        | Left inferior parietal   | Right lateral orbitofrontal  | Left lateral orbitofrontal       | Right fusiform            |
| Left precuneus                  | Left inferior temporal   | Right paracentral            | Left medial orbitofrontal        | Right inferoparietal      |
| Left rostral anterior cingulate | Left lateral occipital   | Right pars opercularis       | Left pars opercularis            | Right inferotemporal      |
| Left superior parietal          | Left lingual             | Right pars orbitalis         | Left pars orbitalis              | Right lateral occipital   |
| Right caudal anterior cingulate | Left middle temporal     | Right pars triangularis      | Left pars triangularis           | Right lingual             |
| Right isthmus cingulate         | Left parahippocampal     | Right postcentral            | Left postcentral                 | Right middle temporal     |
| Right posterior cingulate       | Left pericalcarine       | Right precentral             | Left precentral                  | Right pericalcarine       |
| Right precuneus                 | Left superior temporal   | Right rostral middle frontal | Left rostral middle frontal      | Right parahippocampal     |
| Right superior parietal         | Left supramarginal       | Right superior frontal       | Left superior frontal            | Right superotemporal      |
|                                 | Left temporal pole       | Left cerebellum cortex       | Right frontal pole               | Right supramarginal       |
|                                 | Left transverse temporal | Right accumbens area         | Right medial orbitofrontal       | Right temporal pole       |
|                                 | Left hippocampus         | Right amygdala               | Right rostral anterior cingulate | Right transverse temporal |
|                                 |                          | Right caudate                | Left accumbens area              | Right hippocampus         |
|                                 |                          | Right cerebellum cortex      | Left amygdala                    |                           |
|                                 |                          | Right pallidum               | Left caudate                     |                           |
|                                 |                          | Right putamen                | Left pallidum                    |                           |
|                                 |                          | Right thalamus proper        | Left putamen                     |                           |
|                                 |                          |                              | Left thalamus proper             |                           |

**Note:**—Bankssts indicates cortical areas around superior temporal sulcus.

**On-line Table 4: Modules identified in subjects with PVC, with assignment of nodes to each module**

| Module 1                         | Module 2                 | Module 3                     | Module 4                    | Module 5                  |
|----------------------------------|--------------------------|------------------------------|-----------------------------|---------------------------|
| Left caudal anterior cingulate   | Left bankssts            | Right caudal middle frontal  | Left caudal middle frontal  | Right bankssts            |
| Left paracentral                 | Left cuneus              | Right frontal pole           | Left entorhinal             | Right entorhinal          |
| Left posterior cingulate         | Left inferior parietal   | Right lateral orbitofrontal  | Left frontal pole           | Right fusiform            |
| Left rostral anterior cingulate  | Left inferior temporal   | Right medial orbitofrontal   | Left fusiform               | Right inferior parietal   |
| Left superior frontal            | Left isthmus cingulate   | Right paracentral            | Left insula                 | Right inferior temporal   |
| Right caudal anterior cingulate  | Left lateral occipital   | Right pars opercularis       | Left lateral orbitofrontal  | Right insula              |
| Right cuneus                     | Left lingual             | Right pars orbitalis         | Left medial orbitofrontal   | Right lateral occipital   |
| Right isthmus cingulate          | Left middle temporal     | Right pars triangularis      | Left parahippocampal        | Right lingual             |
| Right posterior cingulate        | Left pericalcarine       | Right precentral             | Left pars opercularis       | Right middle temporal     |
| Right precuneus                  | Left precuneus           | Right rostral middle frontal | Left pars orbitalis         | Right parahippocampal     |
| Right rostral anterior cingulate | Left superior parietal   | Left cerebellum cortex       | Left pars triangularis      | Right pericalcarine       |
| Right superior frontal           | Left superior temporal   | Right accumbens area         | Left postcentral            | Right postcentral         |
|                                  | Left supramarginal       | Right amygdala               | Left precentral             | Right superior parietal   |
|                                  | Left transverse temporal | Right caudate                | Left rostral middle frontal | Right superior temporal   |
|                                  |                          | Right cerebellum cortex      | Left temporal pole          | Right supramarginal       |
|                                  |                          | Right pallidum               | Left accumbens area         | Right temporal pole       |
|                                  |                          | Right putamen                | Left amygdala               | Right transverse temporal |
|                                  |                          | Right thalamus proper        | Left caudate                | Right hippocampus         |
|                                  |                          |                              | Left hippocampus            |                           |
|                                  |                          |                              | Left pallidum               |                           |
|                                  |                          |                              | Left putamen                |                           |
|                                  |                          |                              | Left thalamus proper        |                           |

**Note:**—Bankssts indicates cortical areas around superior temporal sulcus.

**On-line Table 5: Modules identified in patients with segmental callosal agenesis, with assignment of nodes to each module**

| Module 1                 | Module 2                         | Module 3                    | Module 4                  |
|--------------------------|----------------------------------|-----------------------------|---------------------------|
| Left bankssts            | Left caudal anterior cingulate   | Left caudal middle frontal  | Right bankssts            |
| Left cuneus              | Left medial orbitofrontal        | Left entorhinal             | Right cuneus              |
| Left inferior parietal   | Left rostral anterior cingulate  | Left frontal pole           | Right entorhinal          |
| Left inferior temporal   | Right caudal anterior cingulate  | Left fusiform               | Right fusiform            |
| Left lateral occipital   | Right caudal middle frontal      | Left insula                 | Right inferior parietal   |
| Left lingual             | Right frontal pole               | Left isthmus cingulate      | Right inferior temporal   |
| Left middle temporal     | Right lateral orbitofrontal      | Left lateral orbitofrontal  | Right insula              |
| Left pericalcarine       | Right medial orbitofrontal       | Left paracentral            | Right isthmus cingulate   |
| Left superior temporal   | Right paracentral                | Left parahippocampal        | Right lateral occipital   |
| Left supramarginal       | Right pars opercularis           | Left pars opercularis       | Right lingual             |
| Left transverse temporal | Right pars orbitalis             | Left pars orbitalis         | Right middle temporal     |
|                          | Right pars triangularis          | Left pars triangularis      | Right parahippocampal     |
|                          | Right posterior cingulate        | Left postcentral            | Right pericalcarine       |
|                          | Right precentral                 | Left posterior cingulate    | Right postcentral         |
|                          | Right rostral anterior cingulate | Left precentral             | Right precuneus           |
|                          | Right rostral middle frontal     | Left precuneus              | Right superior parietal   |
|                          | Right superior frontal           | Left rostral middle frontal | Right superior temporal   |
|                          | Right accumbens area             | Left superior frontal       | Right supramarginal       |
|                          | Right caudate                    | Left superior parietal      | Right temporal pole       |
|                          | Right cerebellum cortex          | Left temporal pole          | Right transverse temporal |
|                          | Right pallidum                   | Left accumbens area         | Right amygdala            |
|                          | Right putamen                    | Left amygdala               | Right hippocampus         |
|                          | Right thalamus proper            | Left caudate                |                           |
|                          |                                  | Left cerebellum cortex      |                           |
|                          |                                  | Left hippocampus            |                           |
|                          |                                  | Left pallidum               |                           |
|                          |                                  | Left putamen                |                           |
|                          |                                  | Left thalamus proper        |                           |

**Note:**—Bankssts indicates cortical areas around superior temporal sulcus.
